# Supplementary material
Source: MDPI journal article supplement (https://www.mdpi.com/2071-1050/15/5/4670)
Supplement: s1 [file s1]

**Table S1.** Ineligible literature for the review.

| <b>Authors</b>                                                                                                                            | <b>Date</b> | <b>Title</b>                                                                                                                                                | <b>Journal of publication</b>               | <b>The criterion of ineligibility for the review</b> |
|-------------------------------------------------------------------------------------------------------------------------------------------|-------------|-------------------------------------------------------------------------------------------------------------------------------------------------------------|---------------------------------------------|------------------------------------------------------|
| Rickard, L. G, Zimmerman, G. L., Hoberg, E. P. and Wallace, W. H.                                                                         | 1991        | Effect of ivermectin delivered from a sustained-release bolus on the productivity of beef cattle in Oregon                                                  | Veterinary Parasitology                     | Biological Sciences                                  |
| Sutherst, R.W. and Tozer, R.S.                                                                                                            | 1995        | Control of buffalo fly ( <i>Haematobia irritans exigua</i> de Meijere) on dairy and beef cattle using traps                                                 | Australian Journal of Agricultural Research | Biological Sciences                                  |
| Oro, K.                                                                                                                                   | 2000        | The development of beef cattle breeding in Chiburi-Jima Island, Shimane prefecture                                                                          | Japanese Journal of Human Geography         | Biological Sciences                                  |
| DelCurto, T., Porath, M., Parsons C. T. and Morrison, J. A.                                                                               | 2005        | Management Strategies for Sustainable Beef Cattle Grazing on Forested Rangelands in the Pacific Northwest                                                   | Rangeland Ecology & Management              | Biological Sciences                                  |
| M. Mellado and A. Olvera and A. Quero and G. Mendoza                                                                                      | 2005        | Dietary overlap between prairie dog ( <i>Cynomys mexicanus</i> ) and beef cattle in a desert rangeland of northern Mexico                                   | Journal of Arid Environments                | Biological Sciences                                  |
| Nkrumah, J.D., Okine, E.K., Mathison, G.W., Schmid, K., Li, C., Basarab, J.A., Price, M.A., Wang, Z. and Moore, S.S.                      | 2006        | Relationships of feedlot feed efficiency, performance, and feeding behavior with metabolic rate, methane production, and energy partitioning in beef cattle | Journal of Animal Science                   | Description of tools, indexes or indicators          |
| D. Villalba and I. Casasús and A. Sanz and A. Bernués and J. Estany and R. Revilla                                                        | 2006        | Stochastic simulation of mountain beef cattle systems                                                                                                       | Agricultural Systems                        | Biological Sciences                                  |
| Milan, MJ and Bartolome, J and Quintanilla, R and Garcia-Cachan, MD and Espejo, M and Herraiz, PL and Sanchez-Recio, JM and Piedrafita, J | 2006        | Structural characterisation and typology of beef cattle farms of Spanish wooded rangelands (dehesas)                                                        | Livestock Science                           | Biological Sciences                                  |
| Nkrumah, JD and Okine, EK and Mathison, GW and Schmid, K and Li, C and Basarab, JA and                                                    | 2006        | Relationships of feedlot feed efficiency, performance, and feeding behavior with metabolic rate, methane production, and                                    | Journal of Animal Science                   | Biological Sciences                                  |

|                                                                                                                                                              |      |                                                                                                                              |                                          |                                          |
|--------------------------------------------------------------------------------------------------------------------------------------------------------------|------|------------------------------------------------------------------------------------------------------------------------------|------------------------------------------|------------------------------------------|
| Price, MA and Wang, Z and Moore, SS                                                                                                                          |      | energypartitioning in beef cattle                                                                                            |                                          |                                          |
| de Figueiredo, Darcilene Maria and de Oliveira, Andre Soares and LimaSales, Maykel Franklim and Paulino, Mario Fonseca and do Vale, SoniaMaria Leite Ribeiro | 2007 | Economic analysis of four supplementation strategies for growth andfinish beef cattle in a pasture-supplement system         | Brazilian Journal of Animal Science      | Biological Sciences                      |
| Demircan, Vecdi and Koknaroglu, Hayati                                                                                                                       | 2007 | Effect of farm size on Sustainability of beef cattle production                                                              | Journal of Sustainable Agriculture       | Biological Sciences                      |
| Coffey, M.P., Roughtledge, T. and Simm, G.                                                                                                                   | 2008 | Tools for genetic improvement of maternal traits in beef cattle                                                              | Cattle Practice                          | Biological Sciences                      |
| Demircan, V.                                                                                                                                                 | 2008 | The effect of initial fattening weight on sustainability of beef cattle production in feedlots                               | Spanish Journal of Agricultural Research | Biological Sciences                      |
| Demircan, V.                                                                                                                                                 | 2008 | The effect of initial fattening weight on sustainability of beef cattleproduction in feedlots                                | Spanish Journal of Agricultural Research | Biological Sciences                      |
| Reis, Ricardo Andrade and Ruggieri, Ana Claudia and Casagrande, DanielRume and Pascoa, Adriano Gomes                                                         | 2009 | Supplementation of beef cattle as strategy of pasture management                                                             | Brazilian Journal of Animal Science      | Application/Adoption of existing methods |
| Assmann, T.S., Assmann, A.L., Assmann, J.M., Soares, A.B. and Bortolli, M.A.                                                                                 | 2010 | Beef cattle and oat pasture production in a crop-livestock system in presence and absence of clover and nitrogen             | Brazilian Journal of Animal Science      | Biological Sciences                      |
| Sigua, G.C., Coleman, S.W., Albano, J. and Williams, M.                                                                                                      | 2010 | Spatial distribution of soil phosphorus and herbage mass in beef cattle pastures: Effects of slope aspect and slope position | Nutrient Cycling in Agro-ecosystems      | Biological Sciences                      |
| Assmann, Tangriani Simioni and Assmann, Alceu Luiz and Assmann, JoiceMari and Soares,                                                                        | 2010 | Beef cattle and oat pasture production in a crop-livestock system inpresence and absence of clover and nitrogen              | Brazilian Journal of Animal Science      | Biological Sciences                      |

|                                                                                                       |      |                                                                                                                                                                                        |                                                      |                                             |
|-------------------------------------------------------------------------------------------------------|------|----------------------------------------------------------------------------------------------------------------------------------------------------------------------------------------|------------------------------------------------------|---------------------------------------------|
| Andre Brugnara and de Bortolli, Marcos Antonio                                                        |      |                                                                                                                                                                                        |                                                      |                                             |
| Nerea Mandaluniz and Arantza Aldezabal and Luis M. Oregui                                             | 2011 | Diet selection of beef cattle on Atlantic grassland-heathland mosaic: Are heathers more preferred than expected?                                                                       | Livestock Science                                    | Biological Sciences                         |
| Sigua, Gilbert C. and Coleman, Samuel W. and Albano, Joseph and Williams, Mimi                        | 2011 | Spatial distribution of soil phosphorus and herbage mass in beef cattle pastures: effects of slope aspect and slope position                                                           | Nutrient Cycling in Agro-ecosystems                  | Biological Sciences                         |
| Wulfhorst, J.D., Kane, S., Ahola, J.K., Hall, J.B. and Hill, R.A.                                     | 2012 | Producer Awareness and Perceptions about Feed Efficiency in Beef Cattle                                                                                                                | Feed Efficiency in the Beef Industry                 | Application/Adoption of existing methods    |
| Neiberger, H.L. and Johnson, K.A.                                                                     | 2012 | Alpharma Beef Cattle Nutrition Symposium: Nutrition and the genome                                                                                                                     | Journal of Animal Science                            | Biological Sciences                         |
| Neiberger, H. L. and Johnson, K. A.                                                                   | 2012 | Alpharma Beef Cattle Nutrition Symposium: Nutrition and the genome                                                                                                                     | Journal of Animal Science                            | Biological Sciences                         |
| Nielsen, M.K., MacNeil, M.D., Dekkers, J.C.M., Crews, D.H., Rathje, T.A., Enns, R.M. and Weaver, R.L. | 2013 | Life-cycle, total-industry genetic improvement of feed efficiency in beef cattle: Blueprint for the Beef Improvement Federation                                                        | Professional Animal Scientist                        | Description of tools, indexes or indicators |
| Stür, W., Khanh, T.T. and Duncan, A.                                                                  | 2013 | Transformation of smallholder beef cattle production in Vietnam                                                                                                                        | International Journal of Agricultural Sustainability | Biological Sciences                         |
| Regev-Shoshani, G., Church, J.S., Cook, N.J., Schaefer, A.L. and Miller, C.                           | 2013 | Prophylactic nitric oxide treatment reduces incidence of bovine respiratory disease complex in beef cattle arriving at a feedlot                                                       | Research in Veterinary Science                       | Biological Sciences                         |
| Regev-Shoshani, G. and Church, J. S. and Cook, N. J. and Schaefer, A. L. and Miller, C.               | 2013 | Prophylactic nitric oxide treatment reduces incidence of bovine respiratory disease complex in beef cattle arriving at a feedlot                                                       | Research in Veterinary Science                       | Biological Sciences                         |
| Chuntrakort, P., Otsuka, M., Hayashi, K., Takenaka, A., Udchachon, S. and Sommart, K.                 | 2014 | The effect of dietary coconut kernels, whole cottonseeds and sunflower seeds on the intake, digestibility and enteric methane emissions of Zebu beef cattle fed rice straw based diets | Livestock Science                                    | Biological Sciences                         |
| Tamura, S. and Fujie, K.                                                                              | 2014 | Material cycle of agriculture in miyakojima Island:                                                                                                                                    | Sustainability (Switzerland)                         | Biological Sciences                         |

|                                                                                                   |      |                                                                                                                                                                                                            |                                   |                                             |
|---------------------------------------------------------------------------------------------------|------|------------------------------------------------------------------------------------------------------------------------------------------------------------------------------------------------------------|-----------------------------------|---------------------------------------------|
|                                                                                                   |      | Material flow analysis for sugar cane, pasturage and beef cattle                                                                                                                                           |                                   |                                             |
| Chuntrakort, P. and Otsuka, M. and Hayashi, K. and Takenaka, A. and Udchachon, S. and Sommart, K. | 2014 | The effect of dietary coconut kernels, whole cottonseeds and sunflowerseeds on the intake, digestibility and enteric methane emissions of Zebu beef cattle fed rice straw based diets                      | Livestock Science                 | Biological Sciences                         |
| Waldrip, H.M., Cole, N.A. and Todd, R.W.                                                          | 2015 | Nitrogen sustainability and beef-cattle feedyards: I. Introduction and influence of pen surface conditions and diet                                                                                        | Professional Animal Scientist     | Biological Sciences                         |
| Dufey, P.A.                                                                                       | 2015 | Utilisation of whey on mountain pastures by beef cattle                                                                                                                                                    | Agrarforschung Schweiz            | Biological Sciences                         |
| Waldrip, H.M., Cole, N.A. and Todd, R.W.                                                          | 2015 | Nitrogen sustainability and beef-cattle feedyards                                                                                                                                                          | The Professional Animal Scientist | Biological Sciences                         |
| Nasca, J. A. and Feldkamp, C. R. and Arroquy, J. I. and Colombatto, D.                            | 2015 | Efficiency and stability in subtropical beef cattle grazing systems in the northwest of Argentina                                                                                                          | Agricultural Systems              | Description of tools, indexes or indicators |
| Escribano, A.J., Gaspar, P., Mesias, F.J. and Escribano, M.                                       | 2016 | The role of the level of intensification, productive orientation and self-reliance in extensive beef cattle farms                                                                                          | Livestock Science                 | Biological Sciences                         |
| McGinn, S.M., Janzen, H.H., Coates, T.W., Beauchemin, K.A. and Flesch, T.K.                       | 2016 | Ammonia emission from a beef cattle feedlot and its local dry deposition and re-emission                                                                                                                   | Journal of Environmental Quality  | Biological Sciences                         |
| McGinn, S. M. and Janzen, H. H. and Coates, T. W. and Beauchemin, K. A. and Flesch, T. K.         | 2016 | Ammonia Emission from a Beef Cattle Feedlot and Its Local Dry Deposition and Re-Emission                                                                                                                   | Journal of Environmental Quality  | Biological Sciences                         |
| Meyer, L., Powell, J., Kutz, B., Looper, M., Brown, A.H. and Rosenkrans, C.                       | 2017 | Associations of single nucleotide polymorphisms in the bovine prolactin gene with phenotypic traits in beef cattle                                                                                         | Agri Gene                         | Biological Sciences                         |
| Regev-Shoshani, G., McMullin, B., Nation, N., Church, J.S., Dorin, C. and Miller, C.              | 2017 | Non-inferiority of nitric oxide releasing intranasal spray compared to sub-therapeutic antibiotics to reduce incidence of undifferentiated fever and bovine respiratory disease complex in low to moderate | Preventive Veterinary Medicine    | Biological Sciences                         |

|                                                                                                                                                        |      |                                                                                                                                                                                                                                                              |                                                       |                     |
|--------------------------------------------------------------------------------------------------------------------------------------------------------|------|--------------------------------------------------------------------------------------------------------------------------------------------------------------------------------------------------------------------------------------------------------------|-------------------------------------------------------|---------------------|
|                                                                                                                                                        |      | risk beef cattle arriving at a commercial feedlot                                                                                                                                                                                                            |                                                       |                     |
| Gléria, A.A., Silva, R.M., Santos, A.P.P., Santos, K.J.G. and Paim, T.P.                                                                               | 2017 | Beef cattle production in crop-livestock systems                                                                                                                                                                                                             | Archivos de Zootecnia                                 | Biological Sciences |
| Cristel, S., Fiel, C., Anziani, O., Descarga, C., Cetrá, B., Romero, J., Fernández, S., Entrocasso, C., Lloberas, M., Daniel Medus, D. and Steffan, P. | 2017 | Anthelmintic resistance in grazing beef cattle in central and northeastern areas of Argentina                                                                                                                                                                | Veterinary Parasitology: Regional Studies and Reports | Biological Sciences |
| Regev-Shoshani, G. and McMullin, B. and Nation, N. and Church, J. S. and Dorin, C. and Miller, C.                                                      | 2017 | Non-inferiority of nitric oxide releasing intranasal spray compared to sub-therapeutic antibiotics to reduce incidence of undifferentiated fever and bovine respiratory disease complex in low to moderate risk beef cattle arriving at a commercial feedlot | Preventive Veterinary Medicine                        | Biological Sciences |
| Ramirez-Restrepo, C.A. and Vera, R.R.                                                                                                                  | 2018 | Bodyweight performance, estimated carcass traits and methane emissions of beef-cattle categories grazing <i>Andropogon gayanus</i> , <i>Melinis minutiflora</i> and <i>Stylosanthes capitata</i> mixed swards and <i>Brachiaria humidicola</i> pasture       | Animal Production Science                             | Biological Sciences |
| Kaewpila, C., Sommart, K. and Mitsumori, M.                                                                                                            | 2018 | Dietary fat sources affect feed intake, digestibility, rumen microbial populations, energy partition and methane emissions in different beef cattle genotypes                                                                                                | Animal                                                | Biological Sciences |
| Cannizzo, F. T., Cucuzza, L. S., Divari, S., Berio, E., Scaglione, F. E. and Biolatti, B.                                                              | 2018 | Gene expression profile associated with thymus regeneration in dexamethasone-treated beef cattle                                                                                                                                                             | Domestic Animal Endocrinology                         | Biological Sciences |
| Mullenix, M. K. and Rouquette, F.M.                                                                                                                    | 2018 | Cool-season annual grasses or grass-clover management options for extending the fall-winter-early spring                                                                                                                                                     | The Professional Animal Scientist                     | Biological Sciences |

|  |  |                                   |  |  |
|--|--|-----------------------------------|--|--|
|  |  | grazing season for beef<br>cattle |  |  |
|--|--|-----------------------------------|--|--|
